# Supplementary material for: TOM40 Targets Atg2 to Mitochondria-Associated ER Membranes for Phagophore Expansion
Source: PubMed Central journal article supplement — Cell Rep. Author manuscript; Available in PMC 2019 Aug 20. (PMC6701867; doi:10.1016/j.celrep.2019.07.036), 2019-08-13
Supplement: NIHMS1537433-supplement-1.pdf [file NIHMS1537433-supplement-1.pdf]

**Cell Reports, Volume 28**

**Supplemental Information**

**TOM40 Targets Atg2 to Mitochondria-Associated**

**ER Membranes for Phagophore Expansion**

**Zhenyuan Tang, Yoshinori Takahashi, Haiyan He, Tatsuya Hattori, Chong Chen, Xinwen Liang, Han Chen, Megan M. Young, and Hong-Gang Wang**

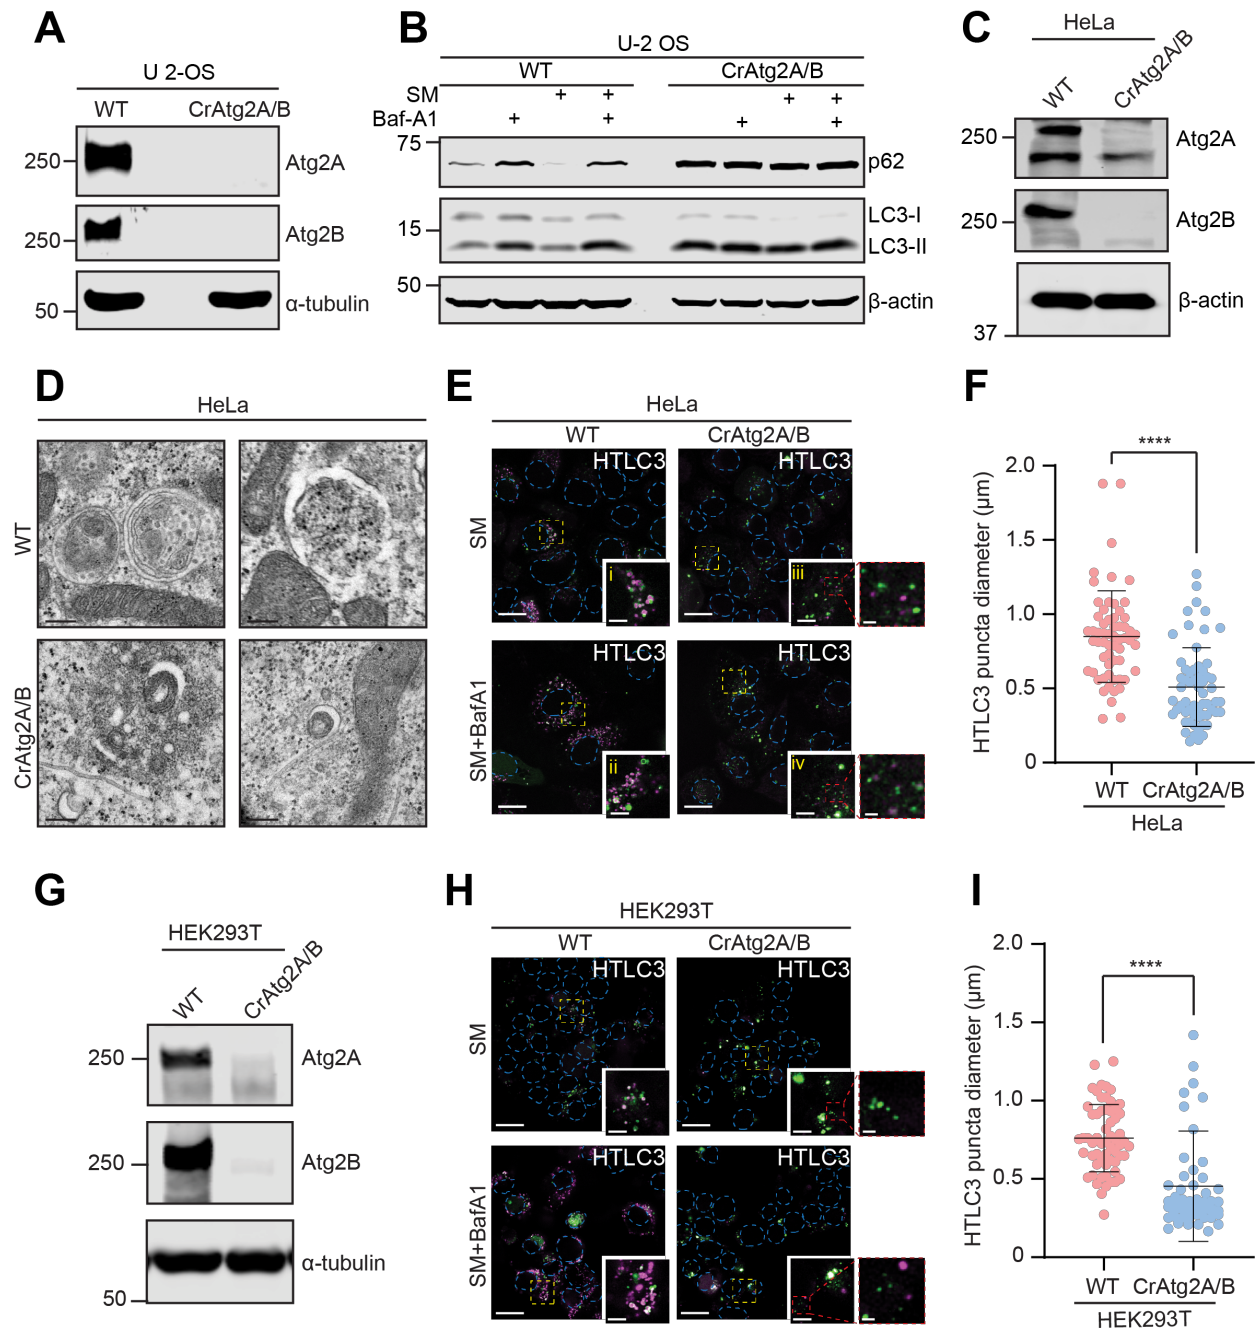

**Figure S1**

**Figure S1. Loss of Atg2A/B impairs autophagic flux and results in small autophagosomes. Related to Figure 1. (A, C, G)** U-2 OS **(A)**, HeLa **(C)**, and HEK293T **(G)** cells were transduced with lentiviruses encoding Cas9 and sgRNAs targeting Atg2A and Atg2B (CrAtg2A/B) and subjected to immunoblotting with the indicated antibodies. **(B)** WT and CrAtg2A/B U-2 OS cells were incubated in complete medium (CM) or starvation medium (SM) for 2 hours in the presence or absence of 100 nM Baf-A1 and subjected to immunoblotting with the indicated antibodies. **(D)** WT and CrAtg2A/B HeLa cells were starved for 2 hours and subjected to transmission electron microscopy. Representative autophagic structures are shown. Red arrowheads indicate autophagic structures. Scale bars represent 200 nm. **(E, H)** HT-LC3-expressing WT and CrAtg2A/B HeLa **(E)** and HEK293T **(H)** cells were incubated in CM or SM in the presence or absence of 100 nM Baf-A1 for 2 hours and subjected to the HT-LC3 autophagosome completion assay followed by confocal microscopy. Magnified images of the boxed areas are shown in the insets (yellow boxes) and the lower bottom right panels (red boxes). Scale bars represent 20  $\mu\text{m}$ , 5  $\mu\text{m}$  (yellow box) and 1  $\mu\text{m}$  (red box) in the magnified images. **(F, I)** The diameters of HT-LC3 foci randomly selected from the starved WT and CrAtg2A/B HeLa **(F)** and HEK293T **(I)** cells were quantified using the Velocity software (n=60). Statistical significance was determined by t-test. All values are mean  $\pm$  SD. \*\*\*\* $p \leq 0.0001$ .

**A**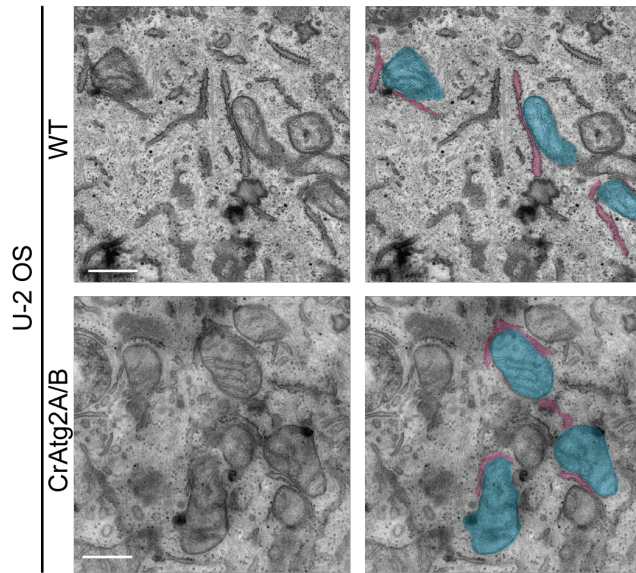**B**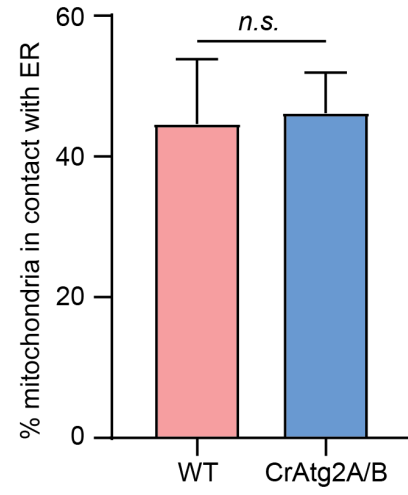**C**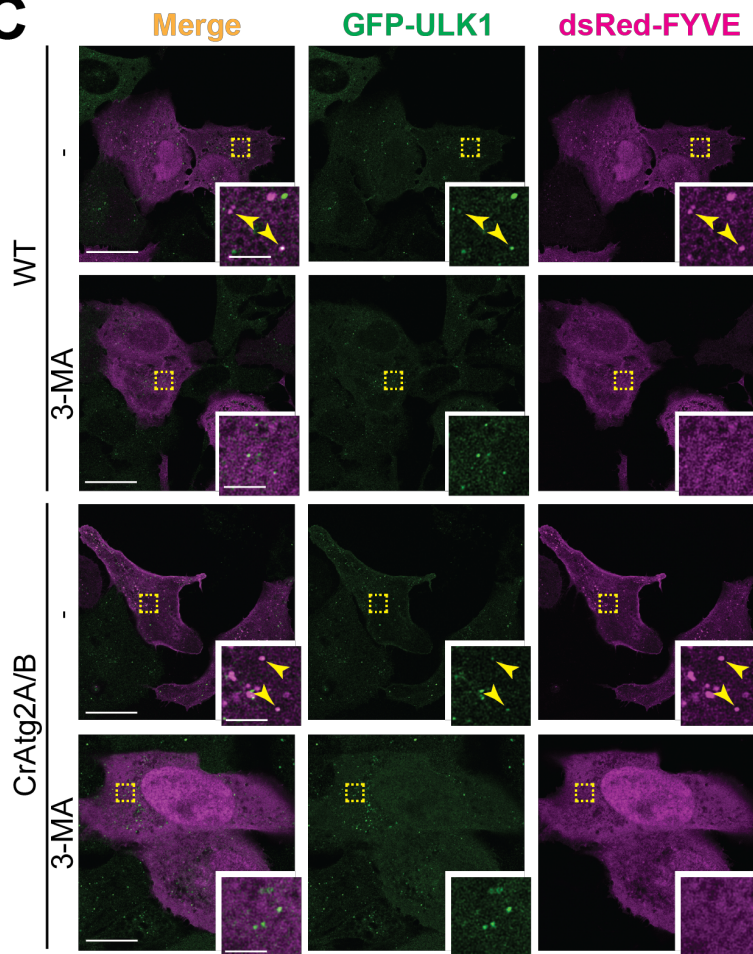**D**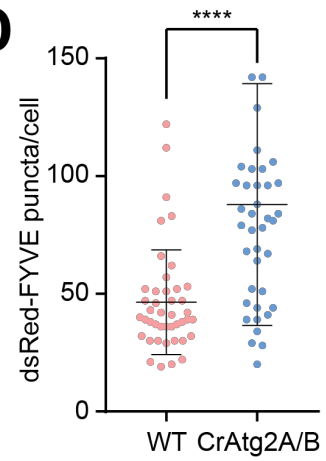**E**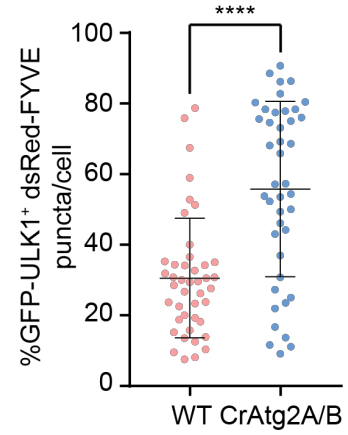**Figure S2**

**Figure S2. Atg2A/B is not essential for mitochondria-ER contact site establishment and PI3P distribution. Related to Figure 2. (A)** WT and CrAtg2A/B U-2 OS cells were starved for 2 hours and subjected for transmission electron microscopy. Blue and magenta labeled areas represent mitochondria and ER, respectively. Scale bars represent 500 nm. **(B)** The percentage of mitochondria that contact with ER in WT and CrAtg2A/B U-2 OS cells were quantified. (n=1191 mitochondria from 19 WT cells; n=1633 mitochondria from 19 CrAtg2A/B cells). **(C)** GFP-ULK1 stable expressing WT and CrAtg2A/B U-2 OS cells were transiently transfected with dsRed-FYVE for 24 hours, starved in the presence or absence of 10 mM 3-MA for 4 hours, and analyzed by confocal microscopy. Magnified images of the boxed areas are shown in the insets. Scale bars represent 30  $\mu\text{m}$ , and 5  $\mu\text{m}$  in the magnified images. **(D, E)** Total dsRed-FYVE puncta **(D)** and the percentage of GFP-ULK1-positive dsRed-FYVE puncta **(E)** per cell in WT and CrAtg2A/B U-2 OS cells were quantified (n=42). Statistical significance was determined by t-test. All values are mean  $\pm$  SD. *n.s.* not significant. \*\*\*\* $p \leq 0.0001$ .

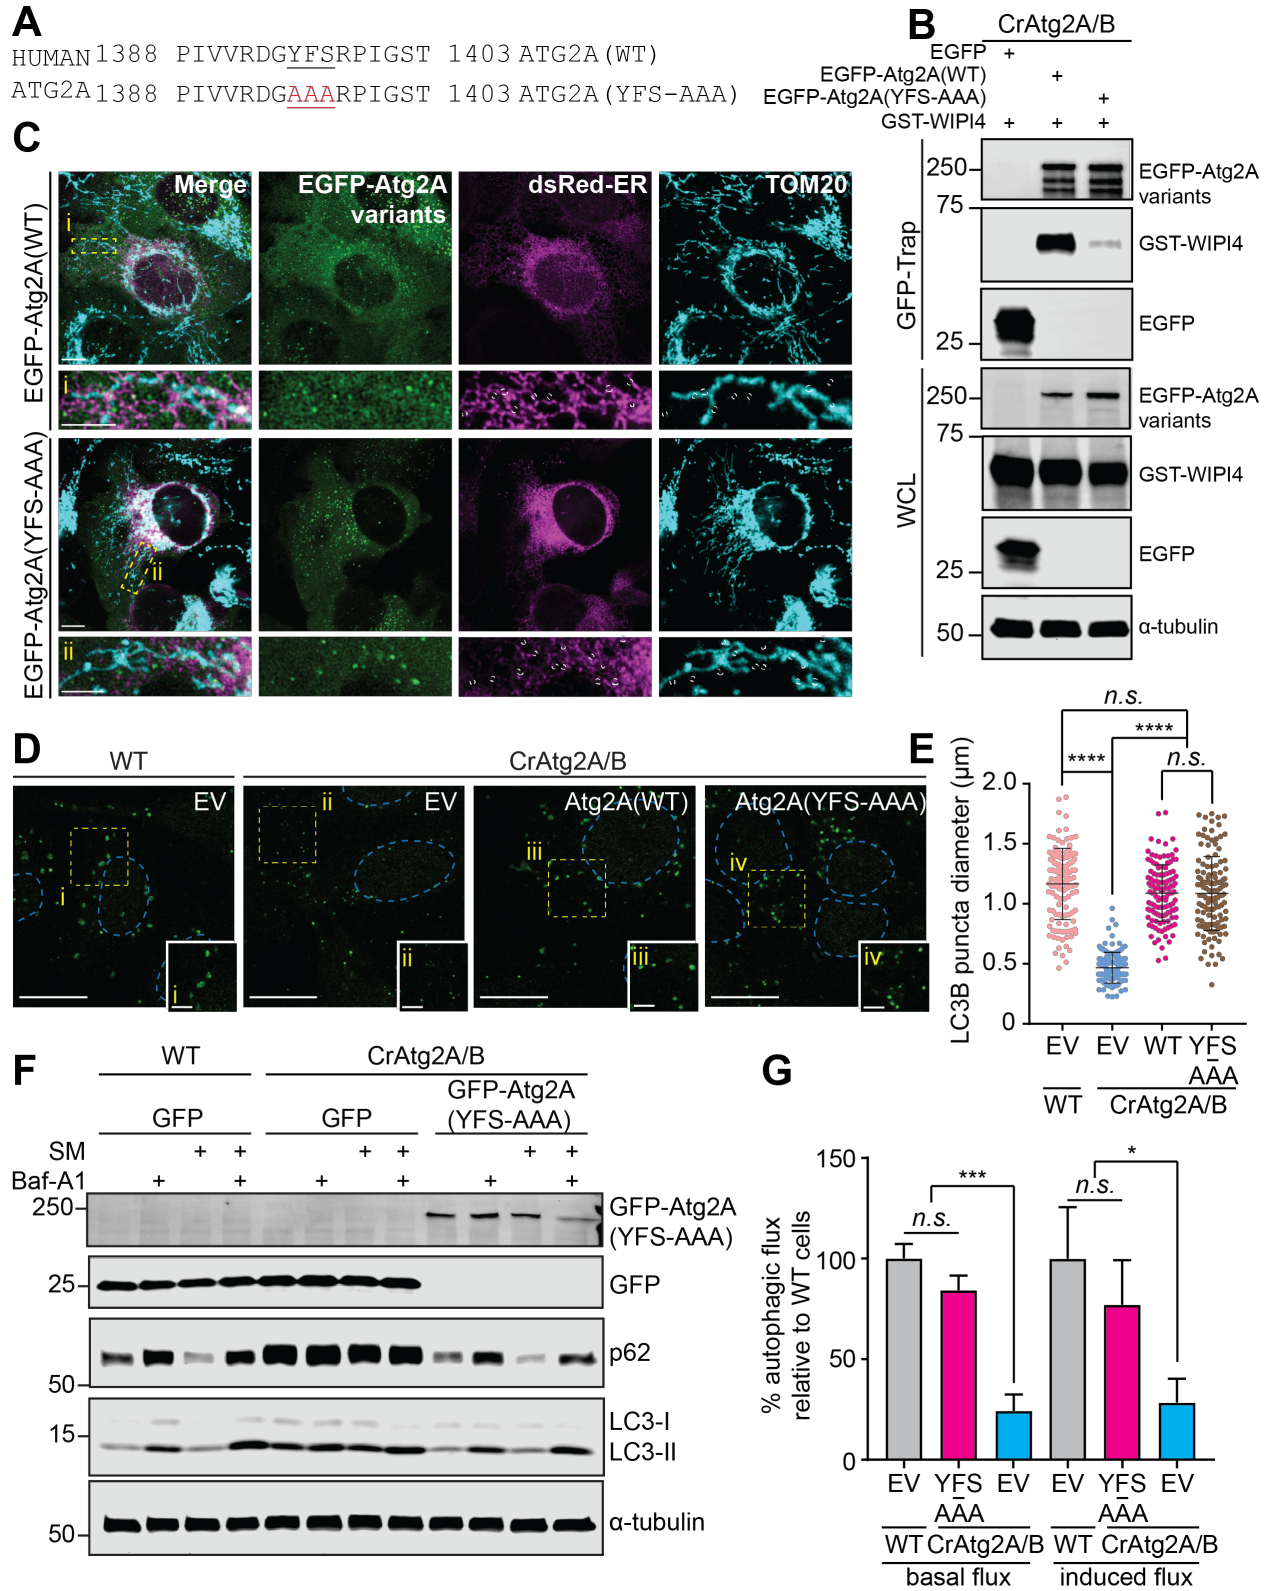

**Figure S3**

**Figure S3. The interaction of Atg2A with WIPI4 is dispensable for both autophagosome formation and autophagic flux. Related to Figure 2. (A)** The amino acid sequence of the WIPI4 interacting region of Atg2A is shown. The mutated region and substituted amino acids are indicated by underlines and red characters. **(B)** CrAtg2A/B HEK293T cells were transfected with the indicated plasmids for 24 hours and subjected to immunoprecipitation with GFP-Trap beads followed by immunoblotting with the indicated antibodies. **(C)** CrAtg2A/B U-2 OS cells stably expressing dsRed-ER and the indicated EGFP-Atg2A variant were starved for 2 hours, stained for TOM20 and analyzed by confocal microscopy. The magnified images in the boxed areas are shown in the lower panels. Scale bars represent 10  $\mu\text{m}$ , and 5  $\mu\text{m}$  in the magnified images. **(D)** CrAtg2A/B cells U2-OS cells stably expressing the indicated EGFP-Atg2A variants were starved for 2 hours, stained for LC3 and analyzed by confocal microscopy. Magnified images in the boxed areas are shown in the insets. Scale bars represent 20  $\mu\text{m}$ , and 5  $\mu\text{m}$  in the magnified images. EV, WT, YFS represent EGFP-empty vector, EGFP-Atg2A(WT), EGFP-Atg2A(YFS), respectively. **(E)** The diameters of LC3 foci were randomly selected and quantified using the Velocity software (n=130). EV, WT, YFS represent EGFP-empty vector, EGFP-Atg2A(WT), EGFP-Atg2A(YFS), respectively. **(F, G)** The indicated U-2 OS cells were incubated in CM or SM for 2 hours in the presence or absence of 100 nM Baf-A1 and subjected to immunoblotting with the indicated antibodies **(F)**. Basal and starvation-induced autophagic flux in the indicated U-2 OS stable transductants were quantified as described in the Methods (n=3) **(F)**. Statistical significance was determined by one-way ANOVA followed by Dunn's multiple comparisons test. All values are mean  $\pm$  SD. *n.s.* not significant. \* $p \leq 0.05$ ; \*\*\* $p \leq 0.001$ ; \*\*\*\* $p \leq 0.0001$ .

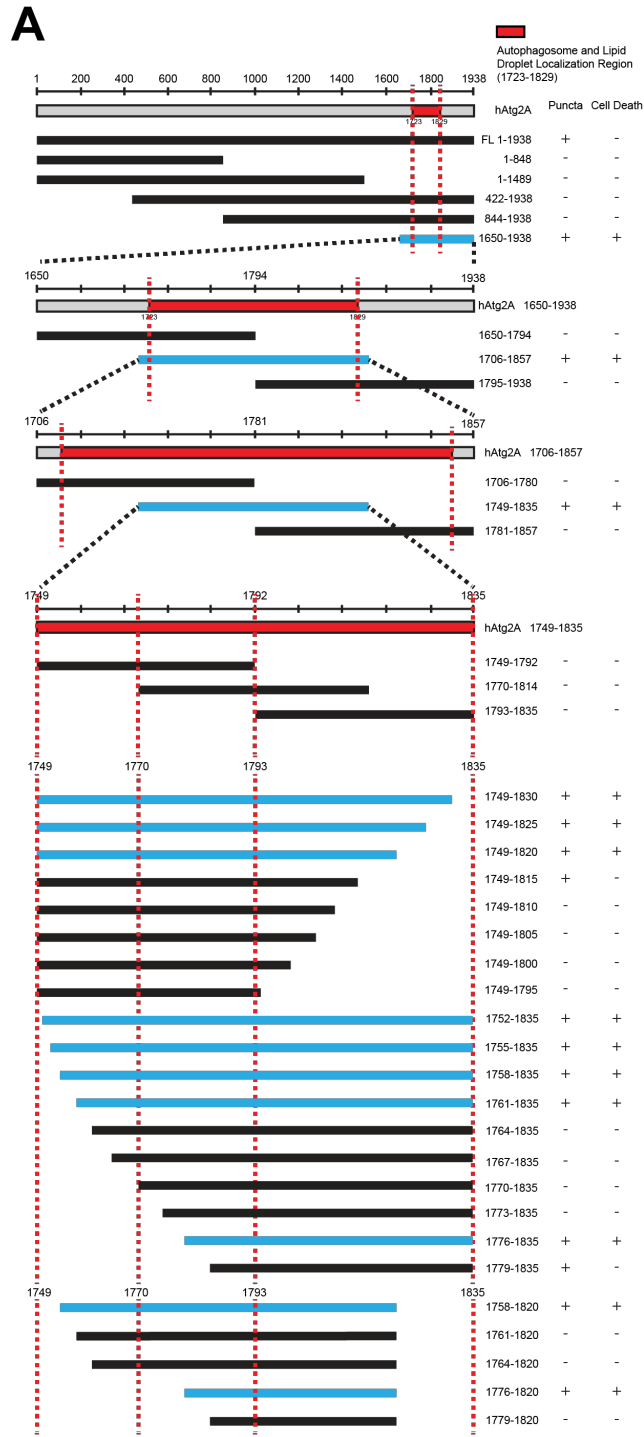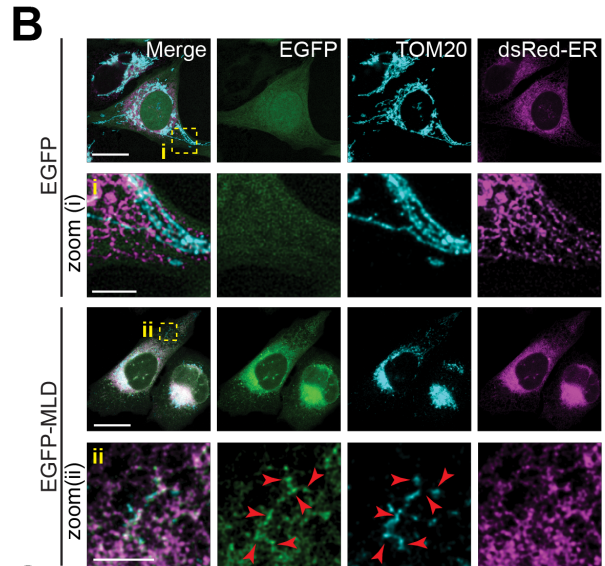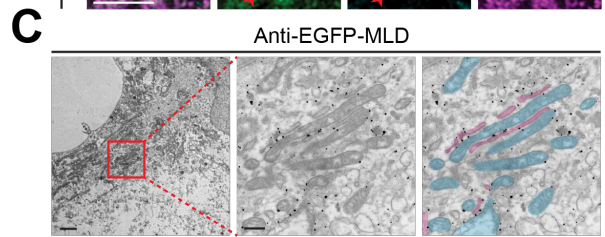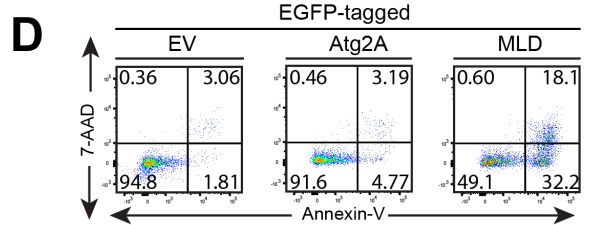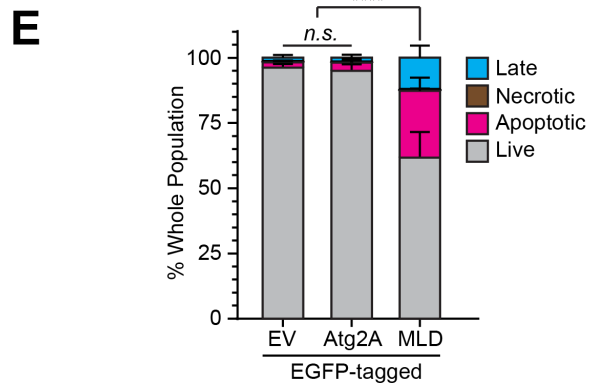

**Figure S4**



**Figure S4. Atg2A(1776-1820) is sufficient for MAM localization. Related to Figure 3. (A)** EGFP-tagged human Atg2A was truncated from N- and/or C-terminus sequentially. CrAtg2A/B HEK293T cells were transiently transfected with Atg2A mutants for 24 hours. Cytosolic EGFP-Atg2A mutant punctuation and cell death were analyzed by fluorescence microscopy. The red box represents the previously identified autophagosome and lipid localization region on human Atg2A (AK Velikkakath et al, MBoC, 2012). **(B)** Schematic illustration of MAM localization domain (MLD) of Atg2A. **(C)** CrAtg2A/B U-2 OS cells stably expressing dsRed-ER were transiently transfected with EGFP or EGFP-MLD and subjected to immunofluorescence confocal microscopy using anti-TOM20 antibody. Magnified images in the boxed areas are shown in the lower panels. Scale bars represent 20  $\mu\text{m}$ , and 5  $\mu\text{m}$  in the magnified images. **(D, E)** CrAtg2A/B U-2 OS cells were transiently transfected with EGFP or EGFP-MLD and subjected to immunoelectron microscopy using anti-GFP antibody **(D)** or Annexin-V and 7-AAD staining and flow cytometry analysis **(E)**. The magnified image (red box) is shown on the right panel. Blue and magenta labeled areas represent mitochondria and ER, respectively. Scale bars represent 2000 nm, 500 nm in the magnified image **(D)**. Statistical significance was determined by one-way ANOVA followed by Dunn's multiple comparisons test. All values are mean  $\pm$  SD. *n.s.* not significant. \*\*\*\* $p \leq 0.0001$ .

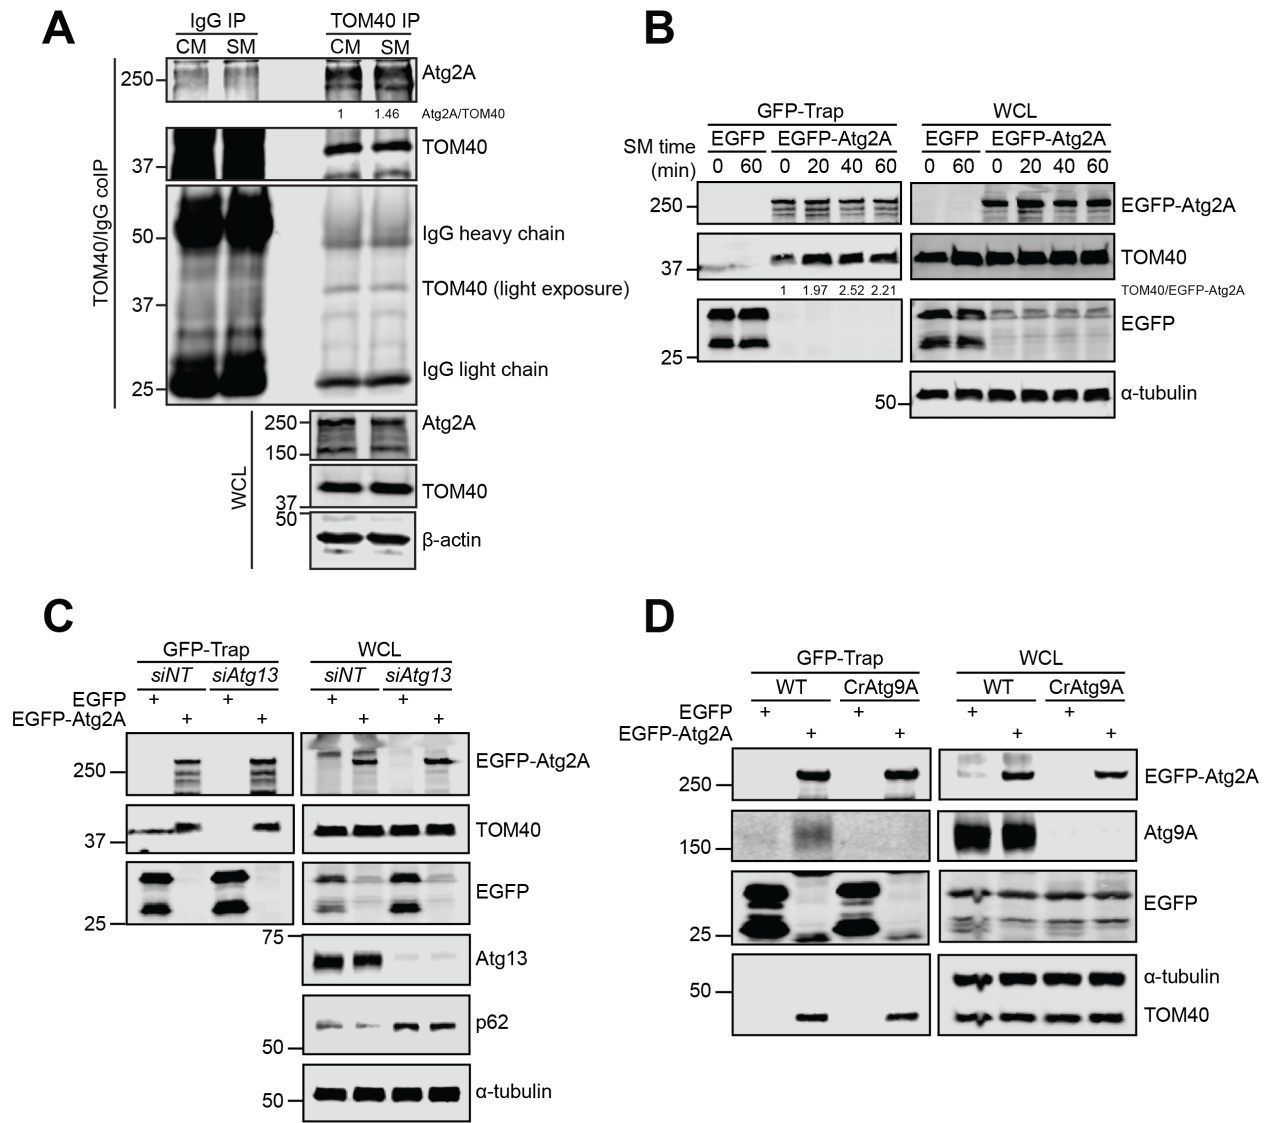

**Figure S5**

**Figure S5. Atg2A-TOM40 interaction is enhanced by starvation but does not require upstream ATG machinery. Related to Figure 3. (A)** WT HEK293T cells were incubated in CM or SM for 1 hour and subjected to immunoprecipitation with control IgG or TOM40 antibody followed by immunoblotting with the indicated antibodies. **(B)** CrAtg2A/B HEK293T cells were transfected with EGFP or EGFP-Atg2A for 24 hours and incubated in SM for the indicated time prior to immunoprecipitation with GFP-Trap and followed by immunoblotting with the indicated antibodies. **(C)** CrAtg2A/B HEK293T cells were transfected with non-targeting (siNT) or Atg13 (siAtg13) siRNA for 48 hours followed by EGFP or EGFP-Atg2A transfection for 24 hours prior to immunoprecipitation with GFP-Trap and followed by immunoblotting with the indicated antibodies. **(D)** WT and CrAtg9A HEK293T cells were transfected with EGPF or EGFP-Atg2A for 24 hours and subjected to immunoprecipitation with GFP-Trap and followed by immunoblotting with the indicated antibodies.

**A**

<sup>I M F L Q TTR A L T S I I H L L F T F M</sup>  
**GRLIRGLQRGAASFGSSTASAALELSNRLVQAIQATAETVYDILS**

H. sapiens 1776 **GRLMRGLQRGAASFGSSTASAALELSNRLVQAIQATAETVYDILS** 1820  
 R. norvegicus 1754 **GRLIRGLQRGAASFGSSTASAALELSNRLVQAIQATAETVYDILS** 1798 Query\_9407  
 M. musculus 1752 **GRLIRGLQRGAASFGSSTASAALELSNRLVQAIQATAETVYDILS** 1796 Query\_9407  
 D. rerio 1863 **GRLIRGLQRGAASFGTSTASAALELSNRLVQAIQATAETVYDILS** 1907 Query\_9407  
 D. melanogaster 1748 **GRLIRGFQLGAQSFTARTALAALELTSRILIHLLQFTAETTFDMLS** 1792 Query\_9407

**B**

Secondary Sequence: **GRLMRGLQRGAASFGSSTASAALELSNRLVQAIQATAETVYDILS** Helix  
 1 5 10 15 20 25 30 35 40 45 Coil

**C**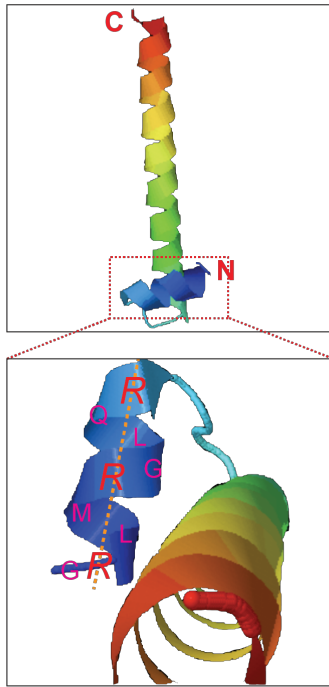**D**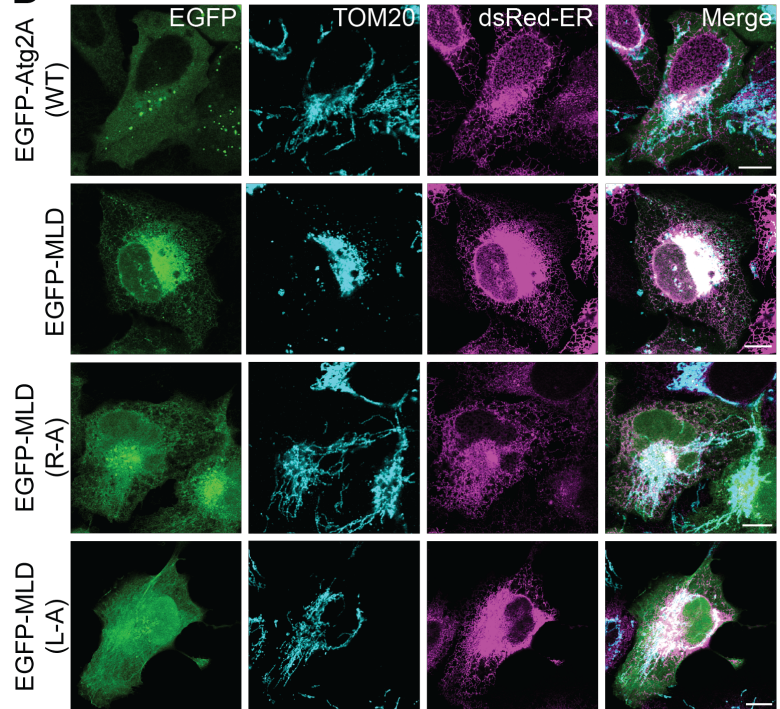**E**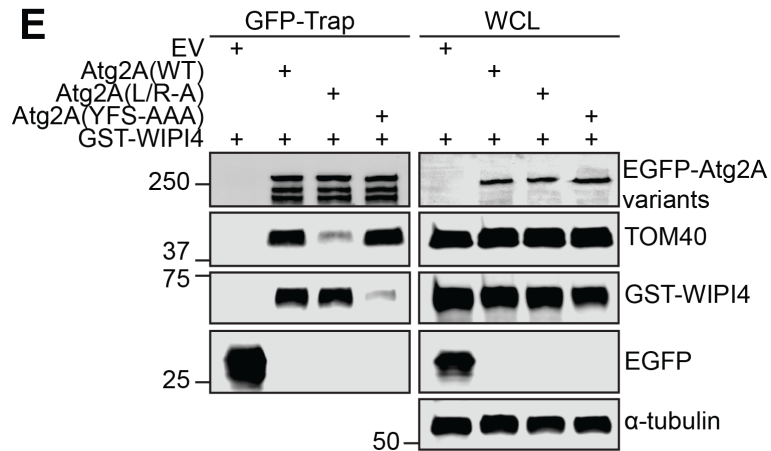**Figure S6**

**Figure S6. The arginine and leucine residues are crucial for MLD localization. Related to Figure 3. (A)** Protein sequence alignment of Atg2A MLD among higher eukaryotes. **(B, C)** Protein secondary **(B)** and tertiary **(C)** structures of MLD were predicted using QUARK ab initio protein structure prediction. Asterisks in **B** indicate the identified crucial amino acid residues for MLD localization. **(D)** dsRed-ER-expressing CrAtg2A/B U2-OS cells were transfected with the indicated EGFP-tagged wild-type or mutant Atg2A for 24 hours, stained for TOM20 and analyzed by confocal microscopy. Scale bars represent 10  $\mu$ m. **(E)** CrAtg2A/B HEK293T cells were transfected with the indicated plasmids for 24 hours and subjected to immunoprecipitation with GFP-Trap beads followed by immunoblotting with the indicated antibodies.

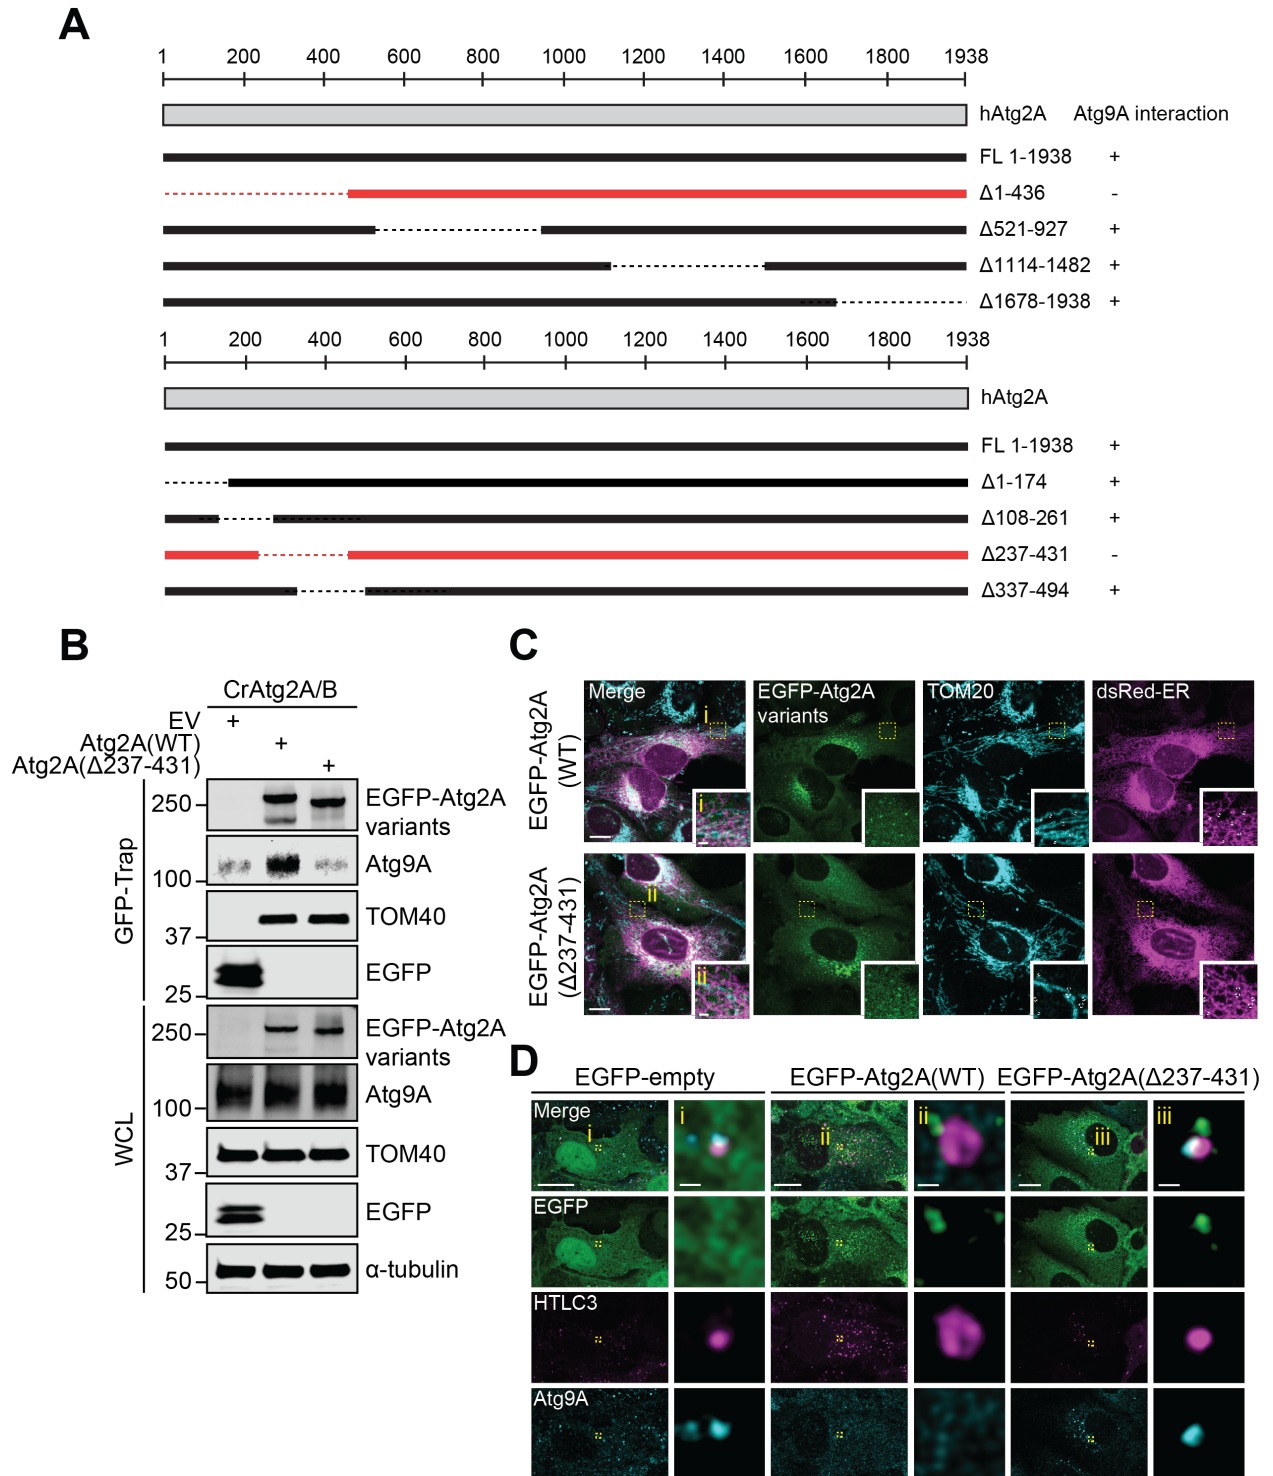

**Figure S7**

**Figure S7. Atg2A is dispensable for the anterograde trafficking of Atg9A. Related to Figure 7. (A)** EGFP-tagged human Atg2A was truncated as indicated. Co-immunoprecipitation analyses were performed using GFP-Trap beads to determine the interaction of the indicated Atg2A mutants with Atg9A. **(B)** CrAtg2A/B HEK293T cells were transfected with EGFP-Atg2A variants for 24 hours and subjected to immunoprecipitation with GFP-Trap beads followed by immunoblotting with the indicated antibodies. **(C, D)** CrAtg2A/B U-2 OS cells stably expressing the indicated plasmids were starved for 2 hours, stained for TOM20 **(C)** or Atg9A and MPL **(TMR) (D)** and analyzed by confocal microscopy. Magnified images in the boxed areas are shown in the insets **(C)** and right panels **(D)**. Scale bars represent 20  $\mu\text{m}$ , 2.5  $\mu\text{m}$  in the insets in **C**, and 0.5  $\mu\text{m}$  in the magnified images in **D**.

**Table S1. List of EGFP-MLD interacting partner candidates. Related to Figure 3.** Protein hits are normalized to their corresponding EGFP- or EGFP-MLD peptide number. All candidates, with over 5-fold enrichment, are listed.

| gene name | EGFP          | EGFP-MLD | EGFP              | EGFP-MLD   | relative fold-change | Subcellular Localization |
|-----------|---------------|----------|-------------------|------------|----------------------|--------------------------|
|           | # of peptides |          | normalize to bait |            |                      |                          |
| EGFP      | 604           | 1485     |                   |            |                      |                          |
| PHB       | 11            | 186      | 0.01821192        | 0.12525253 | 6.877502296          | Mit inner                |
| EMC1      | 5             | 142      | 0.00827815        | 0.0956229  | 11.55124579          | ER                       |
| IMMT      | 3             | 104      | 0.00496689        | 0.07003367 | 14.10011223          | Mit inner                |
| ATAD3B    | 5             | 66       | 0.00827815        | 0.04444444 | 5.368888889          | Mit inner                |
| TOMM40    | 2             | 59       | 0.00331126        | 0.03973064 | 11.9986532           | Mit outer                |
| GOLGA5    |               | 44       | 0                 | 0.02962963 |                      | Golgi                    |
| ALDH3A2   | 3             | 41       | 0.00496689        | 0.02760943 | 5.558698092          | ER                       |
| FAF2      | 3             | 38       | 0.00496689        | 0.02558923 | 5.151964085          | ER                       |
| SAMM50    |               | 38       | 0                 | 0.02558923 |                      | Mit outer                |
| RAB3GAP1  |               | 34       | 0                 | 0.02289562 |                      | Others                   |
| TMEM43    | 2             | 31       | 0.00331126        | 0.02087542 | 6.304377104          | ER                       |
| CHCHD3    | 1             | 29       | 0.00165563        | 0.01952862 | 11.7952862           | Mit inner                |
| ANKLE2    | 1             | 28       | 0.00165563        | 0.01885522 | 11.38855219          | ER                       |
| MMGT1     | 1             | 27       | 0.00165563        | 0.01818182 | 10.98181818          | ER                       |
| AKAP1     |               | 27       | 0                 | 0.01818182 |                      | Mit outer                |
| ZMPSTE24  | 1             | 25       | 0.00165563        | 0.01683502 | 10.16835017          | ER                       |
| TOR1AIP2  | 1             | 25       | 0.00165563        | 0.01683502 | 10.16835017          | ER                       |
| LEMD3     |               | 26       | 0                 | 0.01750842 |                      | Nucleus                  |
| DNAJC11   |               | 26       | 0                 | 0.01750842 |                      | Mit outer                |
| MTX2      |               | 24       | 0                 | 0.01616162 |                      | Mit outer                |
| EMC3      | 1             | 23       | 0.00165563        | 0.01548822 | 9.354882155          | ER                       |
| CLCC1     | 1             | 23       | 0.00165563        | 0.01548822 | 9.354882155          | ER                       |
| DNM1L     | 1             | 22       | 0.00165563        | 0.01481481 | 8.948148148          | Mit outer                |
| ARFGAP1   | 1             | 19       | 0.00165563        | 0.01279461 | 7.727946128          | Mit outer                |
| ATP2C1    |               | 19       | 0                 | 0.01279461 |                      | Golgi                    |
| FKBP8     | 1             | 18       | 0.00165563        | 0.01212121 | 7.321212121          | Mit outer                |
| GOSR1     |               | 19       | 0                 | 0.01279461 |                      | Golgi                    |
| EPHX1     | 1             | 18       | 0.00165563        | 0.01212121 | 7.321212121          | ER                       |
| FAM114A2  |               | 18       | 0                 | 0.01212121 |                      | Nucleus                  |
| SPAG9     | 1             | 17       | 0.00165563        | 0.01144781 | 6.914478114          | Nucleus                  |
| TM9SF3    | 1             | 17       | 0.00165563        | 0.01144781 | 6.914478114          | Others                   |
| SPTLC2    |               | 18       | 0                 | 0.01212121 |                      | ER                       |
| EMC8      | 1             | 17       | 0.00165563        | 0.01144781 | 6.914478114          | ER                       |



|          |   |    |            |            |             |              |
|----------|---|----|------------|------------|-------------|--------------|
| ATP13A1  |   | 18 | 0          | 0.01212121 |             | ER           |
| CENPH    |   | 17 | 0          | 0.01144781 |             | Nucleus      |
| SEC24B   | 1 | 16 | 0.00165563 | 0.01077441 | 6.507744108 | Others       |
| MARCH5   |   | 17 | 0          | 0.01144781 |             | ER Mit outer |
| GHDC     | 1 | 16 | 0.00165563 | 0.01077441 | 6.507744108 | ER           |
| ESYT2    | 1 | 16 | 0.00165563 | 0.01077441 | 6.507744108 | ER           |
| COMT     |   | 17 | 0          | 0.01144781 |             | Others       |
| ABHD12   |   | 17 | 0          | 0.01144781 |             | Others       |
| TMEM205  |   | 16 | 0          | 0.01077441 |             | Others       |
| MTCH2    | 1 | 15 | 0.00165563 | 0.01010101 | 6.101010101 | Mit inner    |
| DHRS7    |   | 16 | 0          | 0.01077441 |             | Others       |
| DHRS7    |   | 16 | 0          | 0.01077441 |             | Others       |
| SYAP1    |   | 15 | 0          | 0.01010101 |             | Others       |
| STIM1    | 1 | 14 | 0.00165563 | 0.00942761 | 5.694276094 | ER           |
| PEX19    | 1 | 13 | 0.00165563 | 0.00875421 | 5.287542088 | Peroxisome   |
| STXBP3   |   | 14 | 0          | 0.00942761 |             | Others       |
| STX5     | 1 | 13 | 0.00165563 | 0.00875421 | 5.287542088 | Golgi        |
| SOAT1    |   | 14 | 0          | 0.00942761 |             | ER           |
| TPD52L2  | 1 | 13 | 0.00165563 | 0.00875421 | 5.287542088 | Others       |
| OSBPL9   | 1 | 13 | 0.00165563 | 0.00875421 | 5.287542088 | Golgi        |
| EMC4     |   | 14 | 0          | 0.00942761 |             | ER           |
| AAAS     |   | 14 | 0          | 0.00942761 |             | Nucleus      |
| CAMLG    |   | 13 | 0          | 0.00875421 |             | ER           |
| NDC1     |   | 13 | 0          | 0.00875421 |             | Nucleus      |
| ATP6V0A1 |   | 13 | 0          | 0.00875421 |             | Others       |
| SURF4    |   | 13 | 0          | 0.00875421 |             | ER           |
| SLC27A4  |   | 13 | 0          | 0.00875421 |             | ER           |
| MCU      |   | 13 | 0          | 0.00875421 |             | Mit inner    |
| OSBPL8   |   | 13 | 0          | 0.00875421 |             | ER           |
| OCIAD1   |   | 13 | 0          | 0.00875421 |             | Endosome     |
| DIABLO   |   | 13 | 0          | 0.00875421 |             | Mit outer    |
| ATP6V0D1 |   | 13 | 0          | 0.00875421 |             | Others       |
| CHCHD6   |   | 12 | 0          | 0.00808081 |             | Mit inner    |
| ATP2B4   |   | 12 | 0          | 0.00808081 |             | Others       |
| QSOX2    |   | 12 | 0          | 0.00808081 |             | Nucleus      |
| MOSPD2   |   | 12 | 0          | 0.00808081 |             | Others       |
| SNAP29   |   | 12 | 0          | 0.00808081 |             | Golgi        |
| TDRKH    |   | 12 | 0          | 0.00808081 |             | Mit outer    |
| LNPBK    |   | 12 | 0          | 0.00808081 |             | ER           |
| NUP210   |   | 12 | 0          | 0.00808081 |             | ER           |
| MCL1     |   | 12 | 0          | 0.00808081 |             | Mit outer    |
| CDKAL1   |   | 12 | 0          | 0.00808081 |             | ER           |
